# Supplementary material for: Explainable artificial intelligence model to predict acute critical illness from electronic health records
Source: PubMed Central journal article supplement (PMC7395744; doi:10.1038/s41467-020-17431-x), 2020-07-31
Supplement: 41467_2020_17431_MOESM1_ESM.pdf [file 41467_2020_17431_MOESM1_ESM.pdf]

SUPPLEMENTARY INFORMATION FOR

# Explainable artificial intelligence model to predict acute critical illness from electronic health records

**Simon Meyer Lauritsen<sup>1,2</sup>, Mads Kristensen<sup>1</sup>, Mathias Vassard Olsen<sup>3</sup>, Morten Skaarup Larsen<sup>3</sup>,  
Katrine Meyer Lauritsen<sup>2</sup>, Marianne Johansson Jørgensen<sup>4</sup>,  
Jeppe Lange<sup>2,4</sup>, Bo Thiesson<sup>1,5</sup>**

*<sup>1</sup>Enversion A/S, Fiskerivej 12, 1st floor, 8000 Aarhus C, Denmark; <sup>2</sup>Department of Clinical Medicine, Aarhus University, Palle Juul-Jensens Boulevard 82, 8200 Aarhus N, Denmark; <sup>3</sup> Department of Biomedical Engineering and Informatics, Aalborg University, Niels Jernes Vej 12, 9220 Aalborg Ø, Denmark; <sup>4</sup>Department of Research, Horsens Regional Hospital, Sundvej 30, 8700 Horsens, Denmark; <sup>5</sup>Department of Engineering, Aarhus University, Inge Lehmanns Gade 10, 8000 Aarhus C, Denmark.*

*\*Corresponding author: Simon Meyer Lauritsen (sla@enversion.dk)*

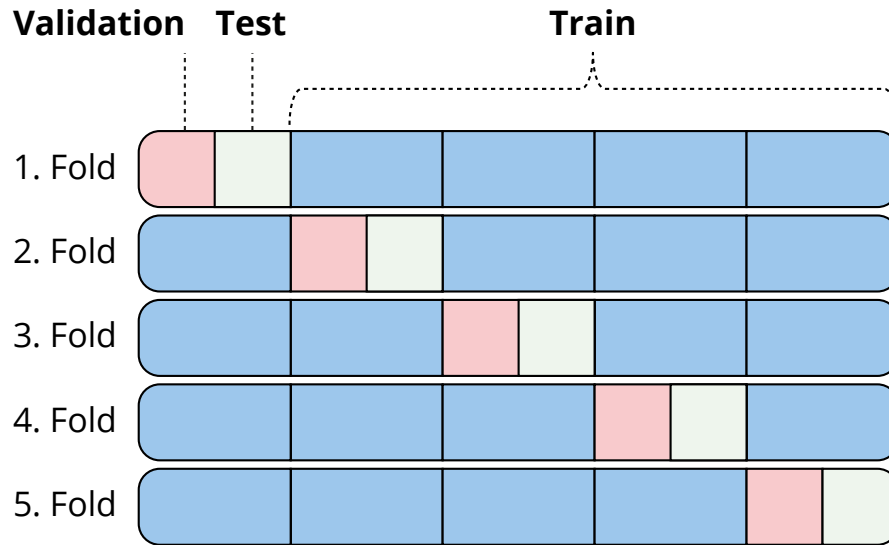

**Supplementary Figure 1 | Cross validation scheme.** Data were randomly divided into 5 portions of 20% each. For each fold four portions (80 %) was used to fit the xAI-EWS model parameters during training. The remaining 20% was split into two portions of 10% each for validation and test. The validation data were used to perform an unbiased evaluation of a model fit during training, and the test data were used to provide an unbiased evaluation of the final model. For each fold data were shifted such that a new portion was used for testing. All data for a single patient was assigned to either train, validation or test data.

**Supplementary Table 1 | The Area Under The Receiver Operating Characteristics (AUROC) curve**

|                    |      | Sepsis |      |      |          | Acute Kidney Injury |      |      |          | Acute Lunge Injury |      |      |          |
|--------------------|------|--------|------|------|----------|---------------------|------|------|----------|--------------------|------|------|----------|
| Hours before onset | Fold | TCN    | SOFA | MEWS | GB-Vital | TCN                 | SOFA | MEWS | GB-Vital | TCN                | SOFA | MEWS | GB-Vital |
| 0                  | 1    | 0.92   | 0.83 | 0.8  | 0.84     | 0.88                | 0.75 | 0.70 | 0.76     | 0.90               | 0.80 | 0.85 | 0.65     |
| 0                  | 2    | 0.95   | 0.84 | 0.82 | 0.83     | 0.87                | 0.74 | 0.68 | 0.78     | 0.90               | 0.80 | 0.89 | 0.61     |
| 0                  | 3    | 0.92   | 0.83 | 0.82 | 0.85     | 0.88                | 0.74 | 0.72 | 0.78     | 0.93               | 0.77 | 0.85 | 0.63     |
| 0                  | 4    | 0.90   | 0.83 | 0.83 | 0.85     | 0.9                 | 0.75 | 0.71 | 0.76     | 0.9                | 0.77 | 0.81 | 0.65     |
| 0                  | 5    | 0.93   | 0.83 | 0.84 | 0.83     | 0.86                | 0.73 | 0.70 | 0.76     | 0.89               | 0.82 | 0.84 | 0.63     |
| 3                  | 1    | 0.88   | 0.80 | 0.78 | 0.81     | 0.85                | 0.74 | 0.68 | 0.70     | 0.85               | 0.74 | 0.85 | 0.63     |
| 3                  | 2    | 0.85   | 0.80 | 0.79 | 0.81     | 0.84                | 0.73 | 0.68 | 0.72     | 0.88               | 0.74 | 0.78 | 0.62     |
| 3                  | 3    | 0.85   | 0.79 | 0.78 | 0.81     | 0.85                | 0.74 | 0.70 | 0.72     | 0.88               | 0.72 | 0.78 | 0.61     |
| 3                  | 4    | 0.89   | 0.79 | 0.78 | 0.80     | 0.83                | 0.75 | 0.68 | 0.71     | 0.85               | 0.73 | 0.81 | 0.55     |
| 3                  | 5    | 0.87   | 0.8  | 0.80 | 0.81     | 0.86                | 0.73 | 0.68 | 0.75     | 0.89               | 0.75 | 0.85 | 0.63     |
| 6                  | 1    | 0.86   | 0.78 | 0.78 | 0.78     | 0.84                | 0.74 | 0.70 | 0.70     | 0.83               | 0.73 | 0.81 | 0.61     |
| 6                  | 2    | 0.85   | 0.77 | 0.77 | 0.77     | 0.85                | 0.72 | 0.68 | 0.69     | 0.82               | 0.69 | 0.78 | 0.63     |
| 6                  | 3    | 0.86   | 0.79 | 0.77 | 0.78     | 0.85                | 0.74 | 0.70 | 0.69     | 0.84               | 0.72 | 0.78 | 0.60     |
| 6                  | 4    | 0.86   | 0.76 | 0.78 | 0.80     | 0.81                | 0.74 | 0.69 | 0.70     | 0.85               | 0.75 | 0.78 | 0.59     |
| 6                  | 5    | 0.83   | 0.79 | 0.77 | 0.80     | 0.83                | 0.73 | 0.67 | 0.68     | 0.88               | 0.70 | 0.71 | 0.63     |
| 12                 | 1    | 0.84   | 0.77 | 0.68 | 0.78     | 0.85                | 0.72 | 0.61 | 0.68     | 0.82               | 0.70 | 0.74 | 0.60     |
| 12                 | 2    | 0.83   | 0.76 | 0.71 | 0.77     | 0.85                | 0.71 | 0.69 | 0.68     | 0.86               | 0.76 | 0.75 | 0.59     |
| 12                 | 3    | 0.84   | 0.77 | 0.71 | 0.78     | 0.86                | 0.72 | 0.66 | 0.65     | 0.84               | 0.76 | 0.83 | 0.61     |
| 12                 | 4    | 0.85   | 0.77 | 0.72 | 0.79     | 0.85                | 0.72 | 0.67 | 0.68     | 0.85               | 0.72 | 0.77 | 0.61     |
| 12                 | 5    | 0.84   | 0.75 | 0.72 | 0.79     | 0.83                | 0.71 | 0.61 | 0.65     | 0.82               | 0.70 | 0.80 | 0.61     |
| 24                 | 1    | 0.81   | 0.72 | 0.71 | 0.79     | 0.8                 | 0.66 | 0.62 | 0.68     | 0.85               | 0.67 | 0.70 | 0.60     |
| 24                 | 2    | 0.81   | 0.72 | 0.71 | 0.79     | 0.77                | 0.66 | 0.61 | 0.60     | 0.84               | 0.65 | 0.71 | 0.60     |
| 24                 | 3    | 0.80   | 0.72 | 0.67 | 0.77     | 0.77                | 0.62 | 0.60 | 0.65     | 0.82               | 0.70 | 0.74 | 0.59     |
| 24                 | 4    | 0.82   | 0.65 | 0.65 | 0.77     | 0.81                | 0.67 | 0.62 | 0.63     | 0.85               | 0.67 | 0.76 | 0.58     |
| 24                 | 5    | 0.77   | 0.71 | 0.61 | 0.76     | 0.79                | 0.62 | 0.62 | 0.60     | 0.83               | 0.67 | 0.75 | 0.58     |

TCN: Temporal Convolutional Network, SOFA: Sequential Organ Failure Assessment, MEWS: Early Warning Score, GB-Vital: Gradient Boosting model based on vital sign parameters.

**Supplementary Table 2 | Area Under The Precision Recall (AUPRC) Curve**

| Hours before onset | Fold | Sepsis |      |      |          | Acute Kidney Injury |      |      |          | Acute Lunge Injury |      |      |          |
|--------------------|------|--------|------|------|----------|---------------------|------|------|----------|--------------------|------|------|----------|
|                    |      | TCN    | SOFA | MEWS | GB-Vital | TCN                 | SOFA | MEWS | GB-Vital | TCN                | SOFA | MEWS | GB-Vital |
| 0                  | 1    | 0.50   | 0.12 | 0.12 | 0.42     | 0.24                | 0.11 | 0.07 | 0.18     | 0.24               | 0.05 | 0.24 | 0.05     |
| 0                  | 2    | 0.48   | 0.11 | 0.14 | 0.42     | 0.21                | 0.14 | 0.07 | 0.20     | 0.25               | 0.05 | 0.12 | 0.05     |
| 0                  | 3    | 0.38   | 0.09 | 0.14 | 0.42     | 0.21                | 0.12 | 0.06 | 0.18     | 0.21               | 0.04 | 0.24 | 0.07     |
| 0                  | 4    | 0.39   | 0.12 | 0.13 | 0.45     | 0.19                | 0.12 | 0.05 | 0.20     | 0.25               | 0.05 | 0.18 | 0.05     |
| 0                  | 5    | 0.40   | 0.11 | 0.13 | 0.41     | 0.23                | 0.12 | 0.07 | 0.17     | 0.22               | 0.05 | 0.19 | 0.07     |
| 3                  | 1    | 0.12   | 0.07 | 0.09 | 0.10     | 0.19                | 0.12 | 0.08 | 0.08     | 0.22               | 0.05 | 0.15 | 0.05     |
| 3                  | 2    | 0.22   | 0.07 | 0.06 | 0.09     | 0.19                | 0.11 | 0.08 | 0.08     | 0.23               | 0.04 | 0.10 | 0.04     |
| 3                  | 3    | 0.16   | 0.09 | 0.09 | 0.14     | 0.23                | 0.12 | 0.06 | 0.07     | 0.18               | 0.06 | 0.20 | 0.04     |
| 3                  | 4    | 0.18   | 0.06 | 0.12 | 0.11     | 0.22                | 0.10 | 0.05 | 0.07     | 0.25               | 0.05 | 0.10 | 0.05     |
| 3                  | 5    | 0.24   | 0.07 | 0.08 | 0.13     | 0.22                | 0.10 | 0.07 | 0.07     | 0.22               | 0.05 | 0.12 | 0.05     |
| 6                  | 1    | 0.15   | 0.06 | 0.07 | 0.08     | 0.21                | 0.10 | 0.07 | 0.03     | 0.23               | 0.05 | 0.15 | 0.05     |
| 6                  | 2    | 0.12   | 0.06 | 0.06 | 0.05     | 0.21                | 0.09 | 0.05 | 0.02     | 0.25               | 0.03 | 0.10 | 0.05     |
| 6                  | 3    | 0.15   | 0.05 | 0.12 | 0.05     | 0.20                | 0.11 | 0.08 | 0.05     | 0.19               | 0.04 | 0.20 | 0.07     |
| 6                  | 4    | 0.15   | 0.05 | 0.07 | 0.07     | 0.19                | 0.09 | 0.07 | 0.02     | 0.26               | 0.05 | 0.09 | 0.03     |
| 6                  | 5    | 0.13   | 0.06 | 0.09 | 0.05     | 0.21                | 0.10 | 0.06 | 0.03     | 0.18               | 0.05 | 0.12 | 0.05     |
| 12                 | 1    | 0.11   | 0.05 | 0.04 | 0.05     | 0.19                | 0.08 | 0.07 | 0.03     | 0.20               | 0.02 | 0.05 | 0.05     |
| 12                 | 2    | 0.10   | 0.05 | 0.07 | 0.04     | 0.19                | 0.10 | 0.06 | 0.02     | 0.24               | 0.02 | 0.04 | 0.05     |
| 12                 | 3    | 0.12   | 0.04 | 0.07 | 0.05     | 0.20                | 0.07 | 0.06 | 0.02     | 0.20               | 0.05 | 0.08 | 0.03     |
| 12                 | 4    | 0.12   | 0.05 | 0.07 | 0.04     | 0.21                | 0.08 | 0.07 | 0.02     | 0.21               | 0.05 | 0.07 | 0.03     |
| 12                 | 5    | 0.11   | 0.09 | 0.05 | 0.07     | 0.19                | 0.08 | 0.05 | 0.03     | 0.22               | 0.02 | 0.07 | 0.05     |
| 24                 | 1    | 0.09   | 0.07 | 0.04 | 0.07     | 0.13                | 0.04 | 0.02 | 0.04     | 0.24               | 0.02 | 0.04 | 0.05     |
| 24                 | 2    | 0.07   | 0.06 | 0.05 | 0.05     | 0.14                | 0.05 | 0.02 | 0.02     | 0.22               | 0.02 | 0.04 | 0.04     |
| 24                 | 3    | 0.08   | 0.04 | 0.05 | 0.05     | 0.13                | 0.03 | 0.03 | 0.02     | 0.22               | 0.02 | 0.05 | 0.02     |
| 24                 | 4    | 0.08   | 0.05 | 0.05 | 0.08     | 0.12                | 0.04 | 0.04 | 0.02     | 0.24               | 0.02 | 0.06 | 0.03     |
| 24                 | 5    | 0.08   | 0.08 | 0.03 | 0.08     | 0.13                | 0.04 | 0.02 | 0.02     | 0.23               | 0.05 | 0.02 | 0.02     |

TCN: Temporal Convolutional Network, SOFA: Sequential Organ Failure Assessment, MEWS: Early Warning Score, GB-Vital: Gradient Boosting model based on vital sign parameters.
